# Supplementary material for: Microbiome shifts during Fusarium oxysporum and F. solani (syn. Neocosmospora solani )—induced Ligusticum chuanxiong root rot: endophtic bacterial protective responses and fungal pathogenic tendencies
Source: PeerJ journal article supplement (doi:10.7717/peerj.20369), 2025-11-25
Supplement: Supplementary_Table_1.xlsx [file Supplementary_Table_1.xlsx]

## Sheet: Sheet1
Supplementary Table 1. Microbial alpha diversity indices in healthy and root rot-infected L. chuanxiong
Sample type Indexes			ace	shannon	shannoneven	coverage
Bacteria	DRR		321.01±77.44b	2.16±1.09b	0.38±0.18	0.9983±0.0003
	DRH		1228.30±266.54a	4.11±0.62a	0.59±0.07	0.9928±0.0014
	HR		1476.05±225.58a	5.14±0.51a	0.72±0.07	0.9921±0.0016
	DS		2739.53±569.96	5.18±0.43b	0.68±0.06b	0.9818±0.0062
	HS		2742.09±168.14	6.13±0.17a	0.80±0.02a	0.9830±0.0025
	DGS		2795.75±265.89	6.09±0.32	0.78±0.03	0.9845±0.0009
	HGS		2876.59±195.20	6.45±0.03	0.82±0.01	0.9857±0.0010
Fungi	DRR		215.30±141.80	1.59±1.21	0.30±0.22	0.9993±0.0005
	DRH		162.56±54.78	1.79±0.51	0.36±0.08	0.9995±0.0002
	HR		201.88±36.23	2.93±0.52	0.56±0.11	0.9998±0.0001
	DS		421.23±57.64	3.39±0.37	0.57±0.06	0.9991±0.0003
	HS		581.47±191.47	3.58±0.32	0.58±0.02	0.9979±0.0011
	DGS		524.49±162.58	3.72±0.18	0.61±0.05	0.9985±0.0013
	HGS		715.45±44.31	3.73±0.32	0.58±0.04	0.9972±0.0003
Different lowercase letters within the same sample type indicate statistically significant differences (P ≤ 0.05). Abbreviations: HR, healthy rhizome; DRH, healthy layer of diseased rhizome; DRR, rot layer of diseased rhizome; HS, healthy rhizosphere soil; HGS, healthy non-rhizosphere soil; DS, diseased rhizosphere soil; DGS, diseased non-rhizosphere soil.
